# Supplementary material
Source: PubMed Central journal article supplement (PMC5807104)
Supplement: NIHMS927930-supplement-8.pdf [file NIHMS927930-supplement-8.pdf]

**Table S2.** Sequences for Alu and other dsRNAs. Related to STAR methods.

| dsRNA               | sequences (5'-3')                                                                                                                                                                                                                                                                                                                                                                                                                             |
|---------------------|-----------------------------------------------------------------------------------------------------------------------------------------------------------------------------------------------------------------------------------------------------------------------------------------------------------------------------------------------------------------------------------------------------------------------------------------------|
| <i>NICNI</i> Alu(+) | CACGUGUCUCUAGCAAAACCAGGGCCUGAGCAUAAGAACUG<br>GGACCCUUCUAGGCAGGGUGCAGUGGCUCACGCCUGUAAUCC<br>CAGCACUUUGGGAGGCCAGGCAGGCGGAUCACCUGAGGUCA<br>GGAGUUCAAGACCAGCCUGACCAACCUGGAGAAACCCCGUCU<br>CUACUAAAAAUACAAAAAUUAGCUGGGCGUGGUGGUAGGC<br>ACCUGUAAUCCCAGCUACUUGGGAGGCUGAGGCAGGAGAAU<br>CUCUUGAACCCGGGAAGUGGAGGUUGCGGACCUGAGAUCAU<br>GCCAUUGCACUCCAGCCUGGGCAAGAAGAGCGAAACUCCAUC<br>UUAACAACAACAACAAAAAAGAACUGGGACCCUUCUG<br>CCAUCUGACAUAGCC            |
| <i>NICNI</i> Alu(-) | CCUUCUGCCAUCUGACAUAGCCCAAAGCACAUUCUCUAUCCUU<br>UCUCCCAGUUGCCCCUCUCCUUUUUUGUUGUUUUUUUGAG<br>GUUGAGUUUUGCUCUUGUUGCCCAGGCUGGAGUGCAAUAGU<br>GCAAUCUUGGCUAACUGCAACCUCGCCUCCCAGGUUCAAGC<br>AAUUCUCCUGCCUCAGUCUCCCAGUAGCUGGGAUUACAGUC<br>AUGCAUCACCAUGCCUGGCUAAUUUUGUAUUUGUAGUAGAG<br>AUGGGGUUUCUCAUGUUGGUCAGGCUGGUCUAAACACCU<br>GACCUCAGGUGAUCUGCCUGCCUUGGCCUCCAAGUGCUGG<br>GAUUACAGGCAUGAGCCACCGCGCCCGGCCUGCCCUUCCA<br>AGAGAU AUGCUCAGCAUAA        |
| <i>BPNT1</i> Alu(+) | UGCAAGCCGAGUUCAGAAUCUAUUAAAAAUGCACUUGUUC<br>CUUAAAGGAAAGUUUCAUUUGGCCGGGCGCGGUGGCUCAUG<br>CCUGUAAUCCCAGCACUUUGGGAGGCCAGGCAGGUGGAUC<br>ACUUGAGCUCAGGAGUUUGAGACCAGCCUGGGCAAUAUCGU<br>GAGACCCCAUCUCUACAAAAAUACAAAUUAACUGGGCAUCCU<br>GUCAUGCGCCUGUCAUCCCAGCUACUUGAGAGGCUGAAGCAG<br>AAGAAUCUCUUGAGCCCGGAAGGCAGAGGUUGCAGUGAGCU<br>GAGAUCGUGCCACUGCACUCCAGCCUGAGUGACAGGAGUUA<br>AGCCUGUCUCAGAAAAAACAACAAAACCCAAAAAGU<br>ACUAAAAGUUUCAUUUACUUAGCUAGGAG |
| <i>BPNT1</i> Alu(-) | GUUCAUGAACAUUCUUAUCUUCUAAACCAGAUUUCUCUUU<br>UUUUUCCUGAGACGGAGUCUCGCUCUGUAGCCUAGGCUAG<br>AAUGUAGUGGCGUGAUCUCGGCUCACUGCAAGCUCGCCUCC<br>CGGGUUCAUGCCAUUCUCCUGCCUCAGCCUCCCAGUAGCUG<br>GGACUGCAGGCACCGCCACCACGCCUGGCUAAUUUUUUGUAU<br>UUUUAGUAGAGAAGGUGUUUACCGUGUUAGCCAGGAUGGU<br>CUUGAUCUCCUGACAUCGUGAUCUGUCUGCCUCGGACUCCA<br>AAGUGCUGGGAUUACAGGUGUGAGCCACCGCACCUGGCCUA<br>AACCAGAUUUCUUUAGGGCACAAUUUUUUCUGGAAUCUCAC<br>UC                         |
| <i>DES11</i> Alu(-) | GGAAAGAAUAAUGAUGUGAGGCCUGGCGCGGUGGCUCACGC<br>CUGUAAUCCCAGCACUUUGGGAGGCCAGGCAGGCAGAUAC<br>UUGAGGUCAGGACUUAAGACCAGCCUGGCCAACAUUGGUGA<br>AACCCCGUCUCUACUAAAAAUACAAAAUAGCCGGGCAUGG                                                                                                                                                                                                                                                                |

|                     |                                                                                                                                                                                                                                                                                                                                                                                                                                        |
|---------------------|----------------------------------------------------------------------------------------------------------------------------------------------------------------------------------------------------------------------------------------------------------------------------------------------------------------------------------------------------------------------------------------------------------------------------------------|
|                     | <p>UGGCGCAUGCCUGUAGUCCAGCUACUCGGGAGGCUGAGGCA<br/> GGAGAAUCGCUUGAACCCGGGAGGCAGAGAUUGCGAUGAGC<br/> CGAGAUCGUACCAGUGCACUCCAGCCUGGGCGACAGAGUGAG<br/> ACUCCAUCUCAAAAAAAAAUAAAUAAGUGGAAUCAAGG<br/> UGGCAAGAAAUUUAGAAUCGUUUCUGAUAGGGACUUUCCC</p>                                                                                                                                                                                              |
| <i>DESII</i> Alu(+) | <p>GGGACCAAGGGAUGGGAUUCCCUACUCUAAGAAAUAACCU<br/> UUUUUUUUUUUUUUUUUUUUUUGAGACGGAGUCUCGCU<br/> CUACCACCCAGGCUGGUGUGCAGUGGCAUGAUCUCGGCUC<br/> CAGAAACCUCUGCCUCCCGGGUUCAAGUGGUUCUCCUGCCU<br/> CAGCCUCCUGAGUAGCUGGGAUUACAGGUGCGUGCCACCAC<br/> GCCAGGCUAAUUUUUGUAUUUCAGUAGAGACAGGGUUUU<br/> GCCAUGUUGGCCAGGCUGGUCUGGAACUCCUGACCUCGGGU<br/> GAUCCACCUCUUGGCCUCCCAAAGUGCUGGGAUUACAGG<br/> CGUGAGCCACCGCUGCCUGGCCAGAAAUAACCUUGAUUAUG<br/> G</p> |
| pre-let7d           | <p>GCCAAGUAGAAGACCAGCAAGAAAAAUAUGGGUUCUA<br/> GGAAGAGGUAGUAGGUUGCAUAGUUUUAGGGCAGGGAUUUU<br/> GCCACAAGGAGGUAACUAUACGACCUGCUGCCUUUCUAGG<br/> GCCUUAUUAUUCACCGAUAACCUGUUUCCUUGCUCG</p>                                                                                                                                                                                                                                                    |
| ES27L               | <p>GGGCUGGGGCGCGAAGCGGGGCUGGGCGCGCGCCGCGGCUGG<br/> ACGAGGCGCCGCCGCCCCCCCCACGCCCGGGGCACCCCCUCG<br/> CGGCCUCCCCCGCCCCACCCGCGCGCGCCGCUCGCUCCCUC<br/> CCCGCCCCGCGCCUCUCUCUCUCUCUCCCCCGCUCCCCCGU<br/> CCUCCCCCUCUCCCGGGGAGCGCCGCGUGGGGGCGGCGGCG<br/> GGGGGAGAAGGUCGGGGCGGCAGGGGCCGGCGGCGGCCCCG<br/> CCGCGGGGCCCGGGCGGGGGCACGGUCCCCCGCGAGGGG<br/> GGCCCCGGGCACCCGGGGGGCCGGCGGGCGGCGGACUCUGGA<br/> CGCGAGCCGGGCCCUUCCCGUGGAUCGCCCCAGCUG</p>   |
| <i>OTUD7B_hAT1</i>  | <p>AAGCAGUGAGAUUCCAAAGGAAGGGAUGUGUAUAUGUCUAG<br/> GCAGGUCUGGAACCUGGUAUGAGAUGAGCACUCCCCUAAGU<br/> UGCAAAAUUUAAAGGGUACUAUAAAACUCAUAAUCAAGAU<br/> ACUAUAAAAAAUAGCAGUAUUUAAAAAAUUAUGCAAAAA<br/> UUUAUGUUGGAUAAAAUAGCGAAAUCUACAGGAUCUGACA<br/> GGACUGAGAUUAGGAGGAGGGAA</p>                                                                                                                                                                  |
| <i>OTUD7B_hAT2</i>  | <p>GAAGUGAGGCUGAAUUGAAUAAGUAUGGGGAUGAAUCCUUC<br/> UUUUUUUUUUUUUUUUUUUUUUUUUUUUUUUUUUUUUUUU<br/> CAUUAUUUGUGAUUUUUUUUUUUUUUUUUUUUUUUUUUUUU<br/> UUUAUCUUGGUUACUGGGUUUUUUUGGCACUCCUUAUUUUU</p>                                                                                                                                                                                                                                           |

|                 |                                                                                                                                                                                                                                                                                                                                                                                                                                                                                                                                                                                                                                                                                                                                                                  |
|-----------------|------------------------------------------------------------------------------------------------------------------------------------------------------------------------------------------------------------------------------------------------------------------------------------------------------------------------------------------------------------------------------------------------------------------------------------------------------------------------------------------------------------------------------------------------------------------------------------------------------------------------------------------------------------------------------------------------------------------------------------------------------------------|
|                 | GUGCCCAAGGUGAGUGCUUUGCUCACCUCACCCUAGUUACGU<br>CCCUGUUUCUGUGAUUUGAACACUAGCGAGAACCACUGU<br>GUGCGCCUCCACCCCAUCACA                                                                                                                                                                                                                                                                                                                                                                                                                                                                                                                                                                                                                                                   |
| <i>NBPF1_L1</i> | UCUGCCGGUGCAGAAUAUGAGCAAUGCCAUGUUCUUGCAGA<br>AAACGCUUAGCCUGAGUUUCAUAGGAGGUAUACACCAGACA<br>ACUGCAGAAUGUAGAACACUGAGCAGGACAACUGACCUGUC<br>UCCUUCACAUAGUCCAUAUCACCACAAAUCACACAACAAAA<br>GGAGAAGAGAUUUUUGGGUUGAAAAAAGUAAAAAGAUAA<br>UGUAGCUGCAUUUCUUUAGUUUUUGAACCCCAAUAUUU<br>CCUCAUCUUUUUGUUGUUGUCAUGGAUGGUGGUGACAUGGA<br>CUUGUUUAUAGAGGACAGGUCAGCUGUCUGGCUCAAUGAUC<br>UACAUUCUGAAGUUGUCUGAAAAUGUCUUCAUGAUUAAAUU<br>CAGCCUAAACUUUUUGACGGGAACACUGCAGAGACAAUGCU<br>GUGAGUUUCCAACCUCAGCCCAUCUGCGGGCAGAGAAGGUCU<br>AGUUUGUCCAACACCAUUAUGAUUUCAGGACUGGUUACUUG<br>GUUAAGGAGGGGUCUAGGAGAUCUGUCCCUUUUAGAGACAC<br>CUUACUUAAUAAUGAAGUACUUGGGAAAGUGGUUUUCAAGAG<br>UAUAAUAUCCUGUAUUCUAAUGAUCAUCCUCUAAACAUUU<br>UAUCAUUUAUUAUCCUCCUGCCUGUGUCUAUUUUUAUUAU<br>UCAUAUCUCUACGCUGCAAUU |
