# Supplementary material
Source: PubMed Central journal article supplement (PMC5807104)
Supplement: NIHMS927930-supplement-9.pdf [file NIHMS927930-supplement-9.pdf]

**Table S3.** Sequences of all DNA oligonucleotides. Related to STAR methods.

| oligos for :                             | oligo name          | target               | sequence (5'-3')                                        |
|------------------------------------------|---------------------|----------------------|---------------------------------------------------------|
| Stimulation of MDA5 2CARD-ZF (Figure 1B) | DNA-ZBS 1X          | N/A                  | G GCGTGGGCG GTGAT                                       |
|                                          | DNA-ZBS 2X          |                      | G GCGTGGGCG GTG GCGTGGGCG T                             |
|                                          | DNA-ZBS 3X          |                      | G GCGTGGGCG GTG GCGTGGGCG GTG GCGTGGGCG T               |
|                                          | DNA-ZBS 4X          |                      | G GCGTGGGCG GTG GCGTGGGCG GTG GCGTGGGCG GTG GCGTGGGCG T |
| RNaseH assay (Figure 5D)                 | RNaseH_Alu1_20a     | consensus Alu (+)    | TTTTGTATTTGTAGTAGAGA                                    |
|                                          | RNaseH_Alu1_20b     |                      | TTTTGTATTTTTGTAGTAGAGA                                  |
|                                          | RNaseH_Alu1_20c     |                      | TTTTGTGTTTTTAGTAGAGA                                    |
|                                          | RNaseH_Alu2_20a     | consensus Alu (-)    | TCTCTACTACAAATACAAAA                                    |
|                                          | RNaseH_Alu2_20b     |                      | TCTCTACAAAAAATACAAAA                                    |
|                                          | RNaseH_Alu2_20c     |                      | TCTCTACTAAAAACACAAAA                                    |
|                                          | RNaseH_Alu2_20d     |                      | TCTCTATGAAAAACACAAAA                                    |
| GAPDH_rv                                 | <i>GAPDH</i>        | TGAAGTCAGAGGAGACCACC |                                                         |
| Alu RT-qPCR (Figure 5F)                  | AluConsF            | consensus Alu        | GCCGGGCGCGGTGGCTCACGCCTGTAATCC CAGCAC                   |
|                                          | AluConsR1           |                      | ATTCTCCTGCCTCAGCCTCCCGAGTAGCTGG GA                      |
|                                          | AluConsR2           |                      | ATCCTCCCACCTCAGCCTCCCGAGTAGCTGG GA                      |
| <i>In vitro</i> transcription templates  | T7prom_NICN1_Alu1_F | <i>NICN1</i> Alu (+) | TAATACGACTCACTATAGGGAGACACGTGT CTCTAGCAAACCAGG          |
|                                          | NICN1_Alu1_R        |                      | CCGGAATTCGGCTATGTCAGATGGCAGAAG G                        |
|                                          | T7prom_NICN1_Alu2_F | <i>NICN1</i> Alu (-) | TAATACGACTCACTATAGGGAGACAAAGCA CATCTCTATCCTTTCTCC       |
|                                          | NICN1_Alu2_R        |                      | CCGGAATTCTTATGCTGAGCATATCTCTTGG AAAGG                   |
|                                          | T7prom_BPNT1_Alu1_F | <i>BPNT1</i> Alu (+) | TAATACGACTCACTATAGGGCAAGCCGAGT TCCAGAATCTATTAA          |
|                                          | BPNT1_Alu1_R        |                      | CTCCTAGCTAAGTAAATGAACTTTAAGTAC TTTTGGG                  |
|                                          | T7prom_BPNT1_Alu2_F | <i>BPNT1</i> Alu (-) | TAATACGACTCACTATAGGGTTCAATGAAC ATTCTATCTTCTAAACC        |
|                                          | BPNT1_Alu2_R        |                      | GAGTGAGATTCCAGAAAAAATTGTGCC                             |

|                       |                            |                               |                                               |
|-----------------------|----------------------------|-------------------------------|-----------------------------------------------|
|                       | T7prom_DESI1<br>Alu1_F     | <i>DESI1</i>                  | TAATACGACTCACTATAGGGACCAAGGGAT<br>GGGA        |
|                       | DESI1_Alul_R               | Alu (-)                       | CCATATCAAAGGTATTTTCTGGCC                      |
|                       | T7prom_DESI1<br>Alu2_F     | <i>DESI1</i>                  | TAATACGACTCACTATAGGAAAGAATAATG<br>ATGTGAGGCC  |
|                       | DESI1_Alul2_R              | Alu (+)                       | GGGAAAGTCCCTATCAGAAACG                        |
|                       | T7prom_pre-<br>let7d_F     | pre-let7d                     | TAATACGACTCACTATAGGGCCAAGTAGAA<br>GACCAGCAAG  |
|                       | pre-let7d_R                |                               | CGAGCAAGGAAACAGGTTATCGG                       |
|                       | T7prom_28SrR<br>NA ES27L_F | ES27L                         | TAATACGACTCACTATAGGGGGCTGGGGCG<br>CGAAGC      |
|                       | 28SrRNA_ES2<br>7L_R        |                               | ATATGGATCCCAGCTGGGGCGATCCAC                   |
|                       | T7prom_OTUD<br>7B_hAT1_F   | <i>OTUD7B_</i>                | TAATACGACTCACTATAGGAAGCAGTGAGA<br>TTCCAAAGGAA |
|                       | OTUD7B_hAT<br>1_R          | hAT1                          | TTCCCTCCTCCTAATCTCAGTCC                       |
|                       | T7prom_OTUD<br>7B_hAT2_F   | <i>OTUD7B_</i>                | TAATACGACTCACTATAGGGAAGTGAGGCT<br>GAATTGAAT   |
|                       | OTUD7B_hAT<br>2_R          | hAT2                          | TGTGATGGGGGTGGAGGCGCA                         |
|                       | 5_T7prom_NB<br>PF1_L1_F    | <i>NBPF1_L</i><br>1           | TAATACGACTCACTATAGGTGCAGAATATG<br>AGCAATGC    |
|                       | NBPF1_L1_R                 |                               | GAGACCCAAAATTTGCAGCGTAGAG                     |
| non-Alu genes<br>qPCR | 18S-qPCR-F                 | 18S                           | CGGCGACGACCCATTCGAAC                          |
|                       | 18S-qPCR-R                 |                               | GAATCGAACCCCTGATTCCCCGTC                      |
|                       | GAPDH-qPCR-F               | <i>GAPDH</i>                  | TGATGACATCAAGAAGGTGGTGAAG                     |
|                       | GAPDH-qPCR-R               |                               | TCCTTGGAGGCCATGTGGGCCAT                       |
|                       | ISG15-qPCR-F               | <i>ISG15</i>                  | GCAGATCACCCAGAAGATTG                          |
|                       | ISG15-qPCR-R               |                               | CATTTGTCCACCACCAGCAG                          |
|                       | IFN $\beta$ -qPCR-F        | <i>MDA5</i>                   | GGGGCATGGAGAATAACTCA                          |
|                       | IFN $\beta$ -qPCR-R        |                               | AGCTGACACTTCCTTCTGCC                          |
|                       | MDA5-qPCR-F                | <i>IFN <math>\beta</math></i> | CTTTCGAAGCCTTTGCTCTG                          |
|                       | MDA5-qPCR-R                |                               | CAGGAGAGCAATTTGGAGGA                          |
|                       | T7 pol-qPCR-F              | <i>T7 pol</i>                 | CGCTAAGAACGACTTCTCTGAC                        |
|                       | T7 pol-qPCR-R              |                               | TAAGTTGACGCTCAAACATCTTGC                      |
