# Supplementary material
Source: PubMed Central journal article supplement (PMC5807104)
Supplement: NIHMS927930-supplement-10.pdf [file NIHMS927930-supplement-10.pdf]

Table S1. List of top 100 most enriched genes (non-ribosomal RNAs). Related to Figure 3

|    | Gene name    | normalized gene count in cytoRNA-2.0 | fold enrichment | location of the enriched site | Enriched element           | # of Alu's within 1kb near enrichment | intronic Alu contribution (intron/total) |
|----|--------------|--------------------------------------|-----------------|-------------------------------|----------------------------|---------------------------------------|------------------------------------------|
| 1  | BRI3BP       | 0.08788                              | 113.10021       | 3'UTR                         | Alu                        | 2                                     | 0%                                       |
| 2  | SCAND2P      | 0.03714                              | 244.20807       | noncoding RNA (exon)          | Alu                        | 2                                     | 0%                                       |
| 3  | DES11        | 0.02644                              | 284.81963       | 3'UTR                         | Alu                        | 2                                     | 0%                                       |
| 4  | ASB16        | 0.02163                              | 122.46643       | 3'UTR                         | Alu                        | 2                                     | 0%                                       |
| 5  | PHAX         | 0.01771                              | 923.22111       | 3'UTR                         | Alu                        | 3                                     | 0%                                       |
| 6  | MCM8         | 0.01628                              | 151.02350       | 3'UTR                         | Alu                        | 3                                     | 0%                                       |
| 7  | PARD6G       | 0.01482                              | 772.61227       | 3'UTR                         | Alu                        | 2                                     | 0%                                       |
| 8  | RHOF         | 0.01416                              | 119.48252       | 3'UTR                         | Alu                        | 2                                     | 0%                                       |
| 9  | CXorf56      | 0.00900                              | 625.75499       | 3'UTR                         | Alu                        | 2                                     | 0%                                       |
| 10 | MREG         | 0.00711                              | 475.50258       | 3'UTR                         | Alu                        | 2                                     | 0%                                       |
| 11 | SNRNP35      | 0.00682                              | 42.86019        | 5'UTR                         | Alu                        | 2                                     | 0%                                       |
| 12 | GNL3L        | 0.00596                              | 31.41732        | 3'UTR                         | Alu                        | 6                                     | 0%                                       |
| 13 | VHL          | 0.00554                              | 140.15785       | 3'UTR, intron                 | Alu                        | 5                                     | 25%                                      |
| 14 | RBM4B        | 0.00520                              | 542.18025       | 3'UTR, antisense              | Alu                        | 4                                     | 25%                                      |
| 15 | POLH         | 0.00512                              | 74.41849        | 3'UTR, intron                 | Alu                        | >8                                    | 75%                                      |
| 16 | ACOX1        | 0.00472                              | 57.15537        | 3'UTR                         | Alu                        | 2                                     | 0%                                       |
| 17 | TRAF3IP2     | 0.00455                              | 48.73953        | 3'UTR                         | Alu                        | 3                                     | 0%                                       |
| 18 | LOC101927257 | 0.00454                              | 128.63144       | antisense                     | Alu                        | 4                                     | 0%                                       |
| 19 | MDM4         | 0.00435                              | 89.58420        | 3'UTR                         | Alu                        | 2                                     | 0%                                       |
| 20 | XPNPEP3      | 0.00434                              | 73.20855        | 3'UTR                         | Alu                        | 8                                     | 0%                                       |
| 21 | TAPBP        | 0.00430                              | 39.91572        | antisense                     | Alu                        | >8                                    | 0%                                       |
| 22 | NOL9         | 0.00419                              | 34.27297        | 3'UTR                         | Alu                        | 4                                     | 0%                                       |
| 23 | XIAP         | 0.00409                              | 139.39803       | 3'UTR                         | Alu                        | 6                                     | 0%                                       |
| 24 | SLC27A1      | 0.00402                              | 163.80395       | 3'UTR, antisense              | Alu                        | >8                                    | 0%                                       |
| 25 | SLC25A15     | 0.00380                              | 254.10355       | 3'UTR                         | Alu                        | 2                                     | 0%                                       |
| 26 | PRR7-AS1     | 0.00341                              | 32.54796        | 3'UTR, intron                 | Alu                        | 2                                     | 10%                                      |
| 27 | METTL16      | 0.00340                              | 113.55439       | 3'UTR                         | Alu                        | 2                                     | 0%                                       |
| 28 | LINC01000    | 0.00338                              | 76.29847        | noncoding RNA (exon)          | Non-Alu hairpin            |                                       |                                          |
| 29 | PSMB2        | 0.00325                              | 37.12375        | 3'UTR                         | Alu                        | 2                                     | 0%                                       |
| 30 | LOC648987    | 0.00323                              | 32.69639        | antisense                     | Alu                        | 1                                     | 0%                                       |
| 31 | ZNF785       | 0.00321                              | 81.36608        | antisense                     | Alu                        | 4                                     | 0%                                       |
| 32 | TRIM59       | 0.00306                              | 62.27078        | 3'UTR, antisense              | Alu                        | 3                                     | 0%                                       |
| 33 | CC2D1B       | 0.00295                              | 49.80539        | 3'UTR                         | Alu                        | 2                                     | 0%                                       |
| 34 | SYT15        | 0.00265                              | 49.10028        | 3'UTR                         | Alu                        | 3                                     | 0%                                       |
| 35 | DENR         | 0.00242                              | 44.96108        | 3'UTR, intron                 | Alu                        | >8                                    | 75%                                      |
| 36 | AP1S3        | 0.00241                              | 122.20568       | 3'UTR                         | Alu                        | 3                                     | 0%                                       |
| 37 | ZSWIM1       | 0.00240                              | 70.20542        | 3'UTR                         | Alu                        | 2                                     | 0%                                       |
| 38 | TFDP2        | 0.00236                              | 43.33546        | 3'UTR                         | Alu                        | 6                                     | 0%                                       |
| 39 | ZSCAN22      | 0.00233                              | 59.84543        | antisense                     | Alu                        | 1 (nearest Alu > 2kb away)            | 0%                                       |
| 40 | MCTS1        | 0.00229                              | 52.46942        | 3'UTR, intron                 | Alu                        | 3                                     | 10%                                      |
| 41 | ZBTB8A       | 0.00228                              | 237.80890       | 3'UTR                         | Alu                        | 4                                     | 0%                                       |
| 42 | NQO2         | 0.00223                              | 112.96141       | 3'UTR, intron                 | Alu                        | 6                                     | 20%                                      |
| 43 | ZNF587       | 0.00223                              | #DIV/0!         | 3'UTR                         | Alu                        | 4                                     | 0%                                       |
| 44 | MRPL30       | 0.00215                              | 87.63120        | 3'UTR                         | Alu                        | 2                                     | 0%                                       |
| 45 | FAM27E3      | 0.00212                              | #DIV/0!         | noncoding RNA (exon)          | atellite and simple_repeat |                                       |                                          |
| 46 | SYNJ2BP      | 0.00210                              | 146.26182       | 3'UTR                         | Alu                        | 2                                     | 0%                                       |
| 47 | WDR73        | 0.00206                              | 42.41276        | 3'UTR                         | Alu                        | 3                                     | 0%                                       |
| 48 | NUP43        | 0.00199                              | 66.39653        | 3'UTR                         | Alu                        | 4                                     | 0%                                       |
| 49 | COX18        | 0.00193                              | #DIV/0!         | 3'UTR                         | Alu                        | 2                                     | 0%                                       |

|     |              |         |           |                      |                 |                           |      |
|-----|--------------|---------|-----------|----------------------|-----------------|---------------------------|------|
| 50  | EPN2-AS1     | 0.00188 | 130.72759 | intron               | Alu             | 2                         | 100% |
| 51  | GNB4         | 0.00180 | 36.68895  | 3'UTR                | Alu             | 3                         | 0%   |
| 52  | MED18        | 0.00180 | 177.18701 | 3'UTR                | Alu             | 2                         | 0%   |
| 53  | LINC00999    | 0.00178 | #DIV/0!   | noncoding RNA (exon) | Non-Alu hairpin |                           |      |
| 54  | ZNF714       | 0.00178 | 185.08100 | 3'UTR                | Alu             | 7                         | 0%   |
| 55  | ATG14        | 0.00172 | 86.87557  | 3'UTR                | Alu             | 2                         | 0%   |
| 56  | ZNF557       | 0.00171 | 178.49615 | 3'UTR                | Alu             | 6                         | 0%   |
| 57  | KIAA1143     | 0.00163 | 170.31857 | 3'UTR                | Alu             | 2                         | 0%   |
| 58  | ACBD4        | 0.00162 | 112.89436 | antisense            | Alu             | 4                         | 0%   |
| 59  | NICN1        | 0.00160 | #DIV/0!   | 3'UTR                | Alu             | 2                         | 0%   |
| 60  | HOOK3        | 0.00156 | 52.14069  | 3'UTR, intron        | Alu             | 7                         | 10%  |
| 61  | ZNF154       | 0.00152 | 76.78186  | 3'UTR                | Alu             | 2                         | 0%   |
| 62  | AHR          | 0.00151 | 76.70604  | 3'UTR                | Alu             | 2                         | 0%   |
| 63  | XRCC2        | 0.00149 | 50.73753  | 3'UTR                | Alu             | 2                         | 0%   |
| 64  | PIK3CD       | 0.00148 | 74.90745  | 3'UTR/antisense      | Alu             | 4                         | 0%   |
| 65  | MRPS16       | 0.00148 | 37.94555  | 3'UTR                | Alu             | 4                         | 0%   |
| 66  | DNAJC24      | 0.00145 | 49.45985  | 3'UTR                | Alu             | 2                         | 0%   |
| 67  | TMEM220      | 0.00141 | #DIV/0!   | antisense            | Alu             | 1 (nearest Alu <2kb away) | 0%   |
| 68  | INPP5B       | 0.00141 | 293.31181 | 3'UTR                | Alu             | 2                         | 0%   |
| 69  | MRI1         | 0.00140 | #DIV/0!   | 3'UTR                | Alu             | 4                         | 0%   |
| 70  | TBC1D22A     | 0.00136 | 282.81884 | intron               | Alu             | 2                         | 100% |
| 71  | ZNF587       | 0.00130 | 90.26076  | 3'UTR, intron        | Alu             | 4                         | 10%  |
| 72  | LYRM7        | 0.00128 | 266.15149 | 3'UTR                | Alu             | 5                         | 0%   |
| 73  | LOC100996251 | 0.00126 | 124.03637 | antisense            | Alu             | >8                        | 0%   |
| 74  | ZNF674       | 0.00122 | 253.70445 | intron, 3'UTR        | Alu             | >8                        | 90%  |
| 75  | SBSPON       | 0.00119 | 34.71973  | 3'UTR                | Alu             | 1 (nearest Alu <2kb away) | 0%   |
| 76  | AKAP5        | 0.00117 | #DIV/0!   | 3'UTR                | Alu             | 2                         | 0%   |
| 77  | ZNF431       | 0.00112 | 116.97496 | 3'UTR, intron        | Alu             | >8                        | 20%  |
| 78  | TMEM192      | 0.00111 | 230.45226 | 3'UTR                | Alu             | 3                         | 0%   |
| 79  | ANAPC16      | 0.00110 | 229.31913 | 3'UTR, intron        | Alu             | >8                        | 40%  |
| 80  | PDE6A        | 0.00108 | #DIV/0!   | 3'UTR, antisense     | Alu             | 7                         | 0%   |
| 81  | PDDC1        | 0.00108 | 36.91368  | 3'UTR                | Alu             | 7                         | 0%   |
| 82  | PTGR2        | 0.00107 | 71.80865  | 3'UTR, intron        | Alu             | 6                         | 75%  |
| 83  | PPM1K        | 0.00103 | 68.70621  | 3'UTR                | Alu             | 5                         | 0%   |
| 84  | OIP5-AS1     | 0.00098 | 102.62300 | noncoding RNA (exon) | Alu             | >8                        | 0%   |
| 85  | ZDHC20       | 0.00098 | 68.41533  | 3'UTR, intron        | Alu             | 4                         | 25%  |
| 86  | ZNF417       | 0.00096 | #DIV/0!   | 3'UTR                | Alu             | 2                         | 0%   |
| 87  | ICMT         | 0.00095 | 39.65014  | 3'UTR                | Alu             | 2                         | 0%   |
| 88  | LRR37A3      | 0.00094 | 195.47569 | antisense            | Alu             | >8                        | 0%   |
| 89  | MAGT1        | 0.00094 | 65.05450  | 3'UTR                | Alu             | 3                         | 0%   |
| 90  | RNF125       | 0.00089 | 59.59916  | 3'UTR                | Alu             | 4                         | 0%   |
| 91  | MXRA7        | 0.00089 | 185.08100 | 3'UTR, intron        | Alu             | >8                        | 75%  |
| 92  | FUT2         | 0.00089 | 36.16590  | antisense            | Alu             | >8                        | 0%   |
| 93  | GTPBP10      | 0.00088 | 183.12693 | 3'UTR                | Alu             | 4                         | 0%   |
| 94  | NXN          | 0.00087 | 90.38120  | 3'UTR, intron        | Alu             | >8                        | 95%  |
| 95  | RBSN         | 0.00084 | 42.40090  | 3'UTR                | Alu             | 3                         | 0%   |
| 96  | DENND6A      | 0.00083 | 57.68148  | 3'UTR                | Alu             | 2                         | 0%   |
| 97  | ZNF101       | 0.00081 | #DIV/0!   | 3'UTR                | Alu             | 7                         | 0%   |
| 98  | LOC100128531 | 0.00081 | 33.05022  | antisense            | Alu             | 2                         | 0%   |
| 99  | GINS4        | 0.00080 | 55.34970  | 3'UTR                | Alu             | 2                         | 0%   |
| 100 | FAM20B       | 0.00079 | 77.49270  | 3'UTR                | Alu             | 2                         | 0%   |

Genes are organized in the descending order of normalized gene counts.
