# Supplementary material
Source: PubMed Central journal article supplement (PMC5807104)

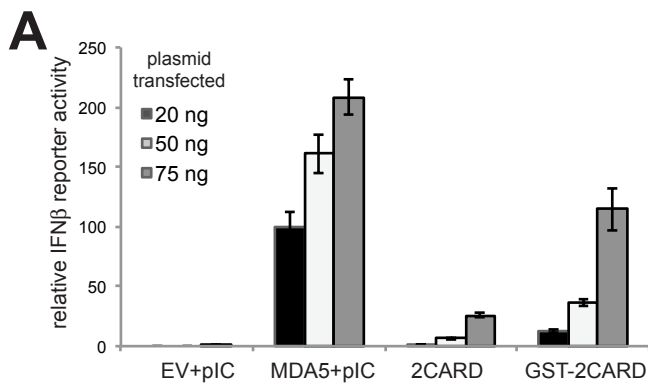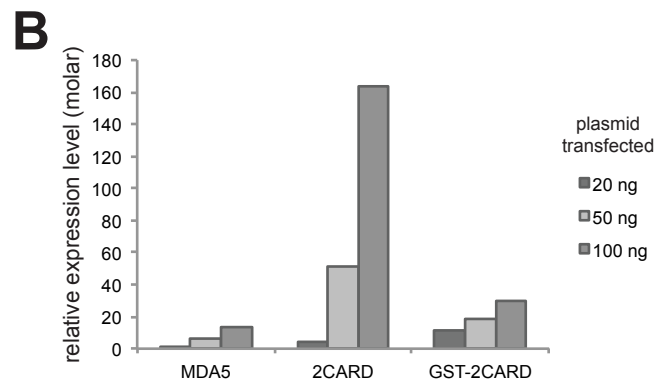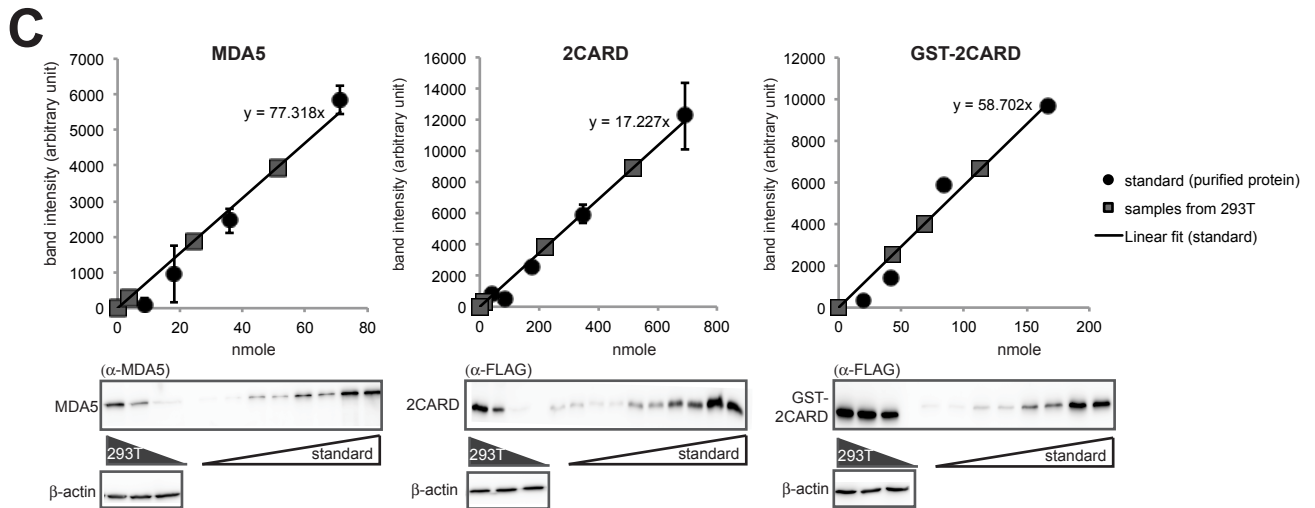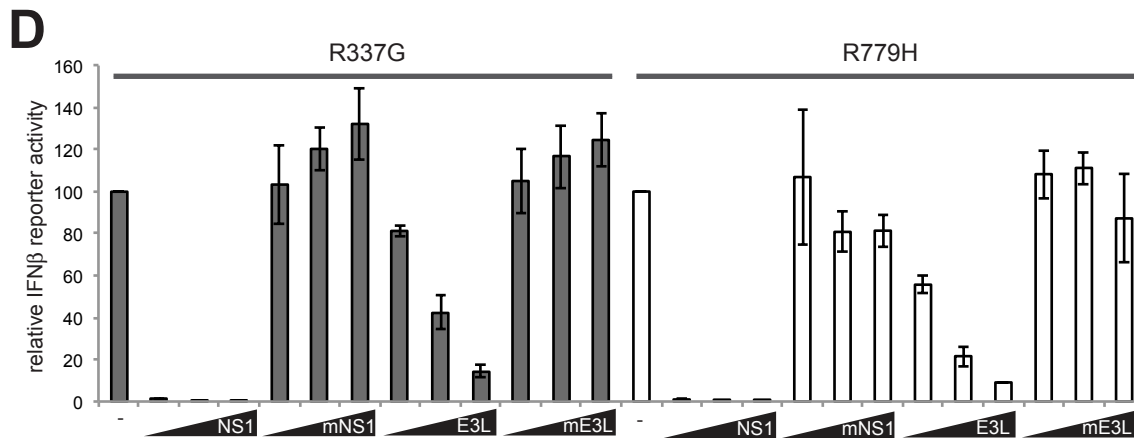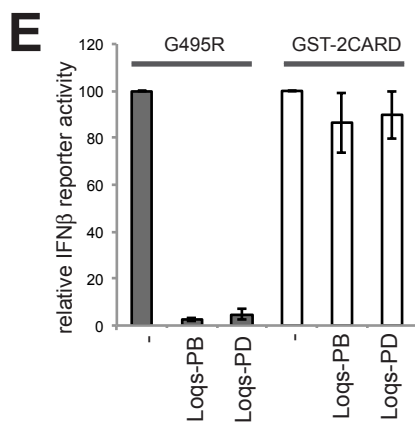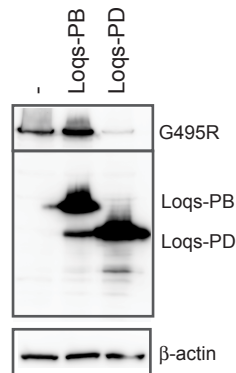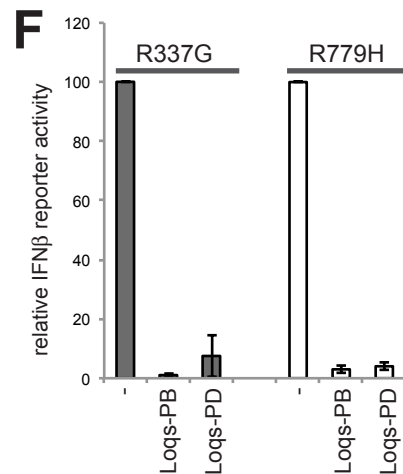

Supplement: NIHMS927930-supplement-1.pdf [file NIHMS927930-supplement-1.pdf]

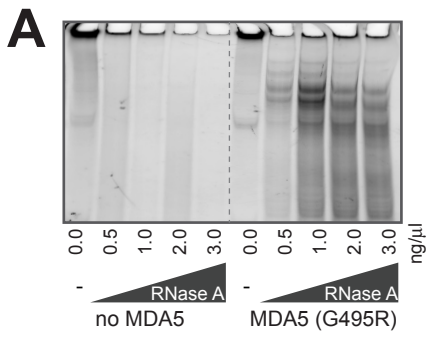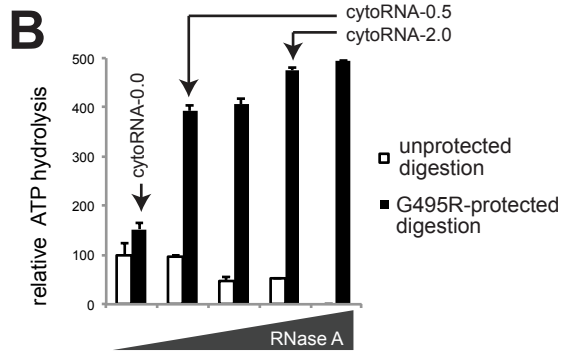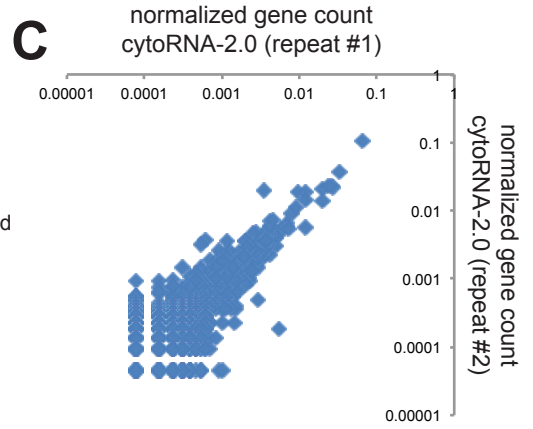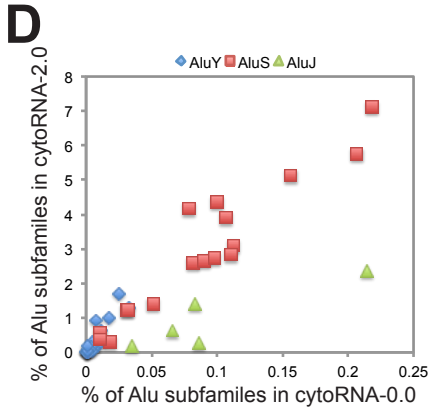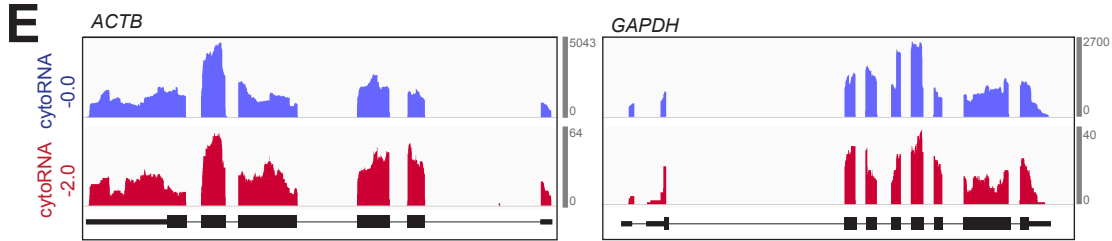

**G**

|             | cytoRNA-0.0 | cytoRNA-2.0 |
|-------------|-------------|-------------|
| sense %     | 87.6 (0.1)  | 85.8 (0.8)  |
| antisense % | 2.3 (0.1)   | 6.2 (0.6)   |

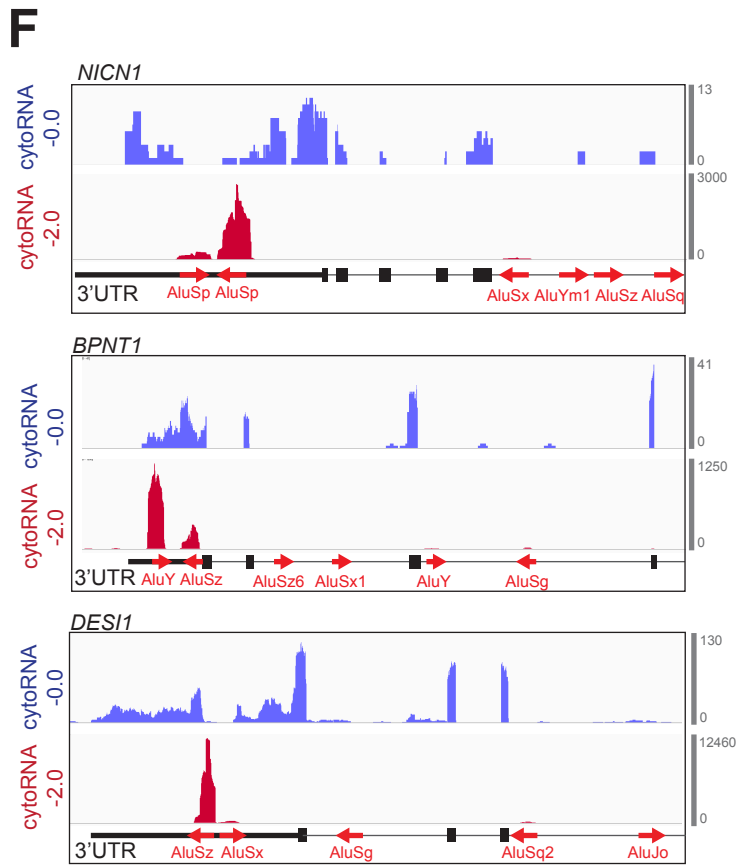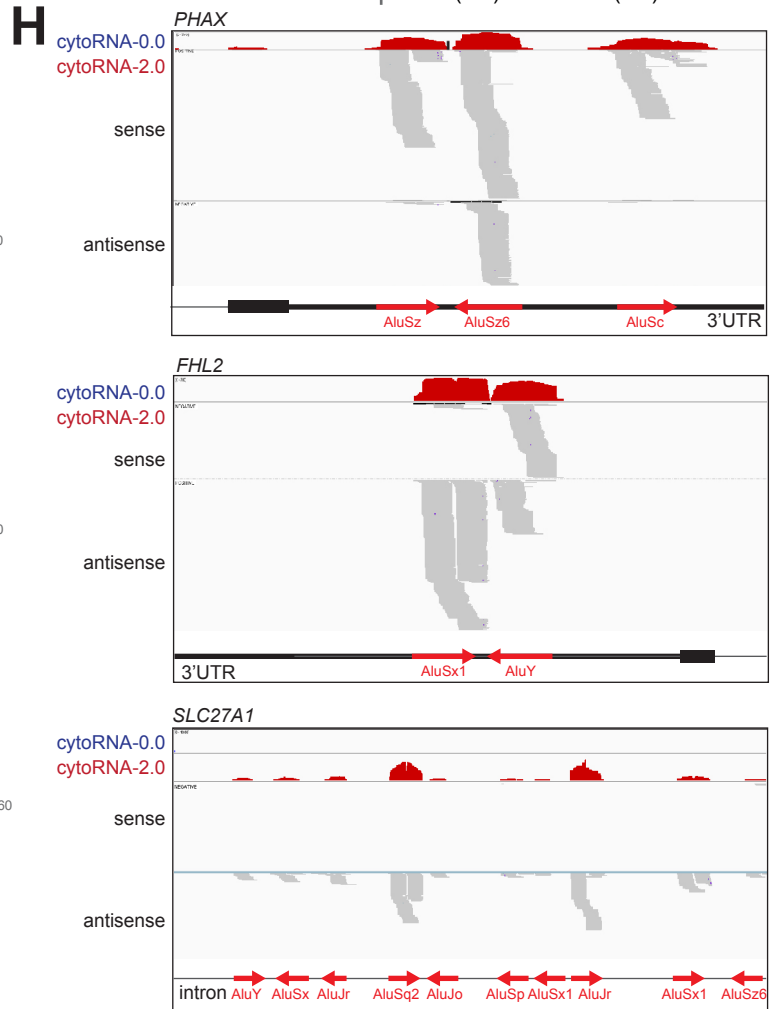

Supplement: NIHMS927930-supplement-3.pdf [file NIHMS927930-supplement-3.pdf]

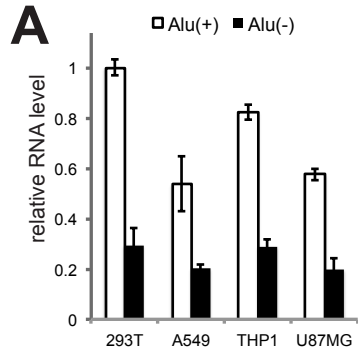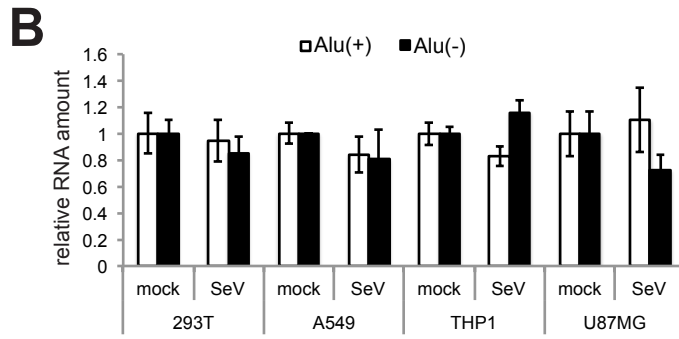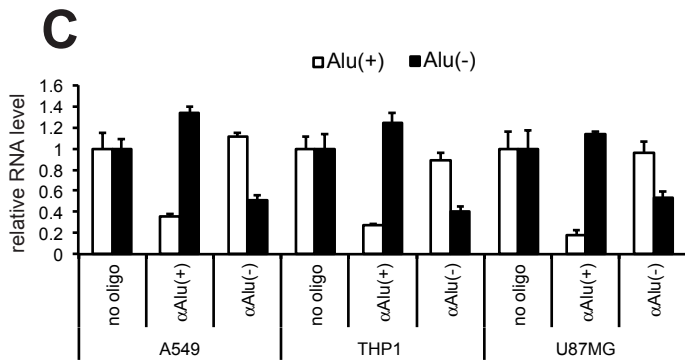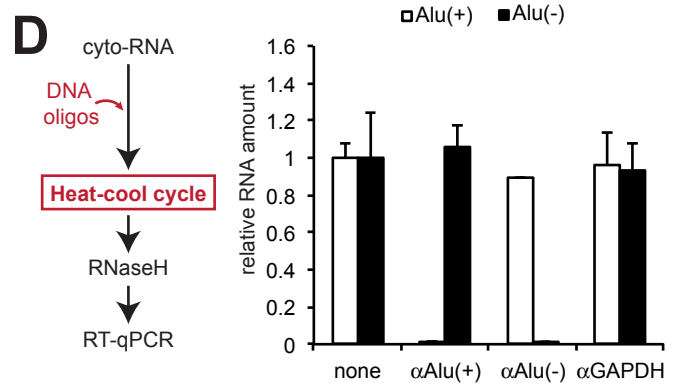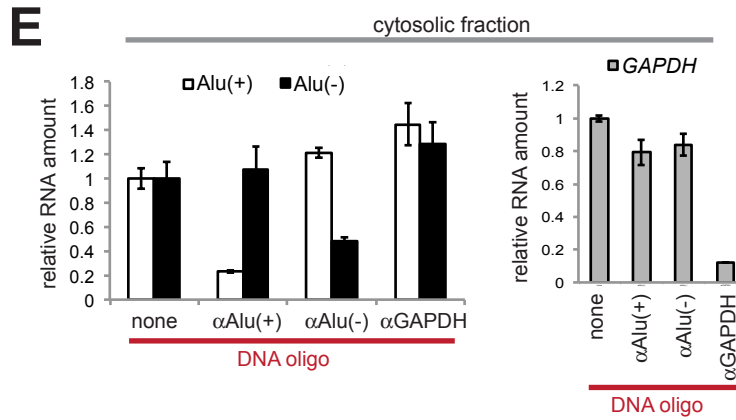

Supplement: NIHMS927930-supplement-5.pdf [file NIHMS927930-supplement-5.pdf]

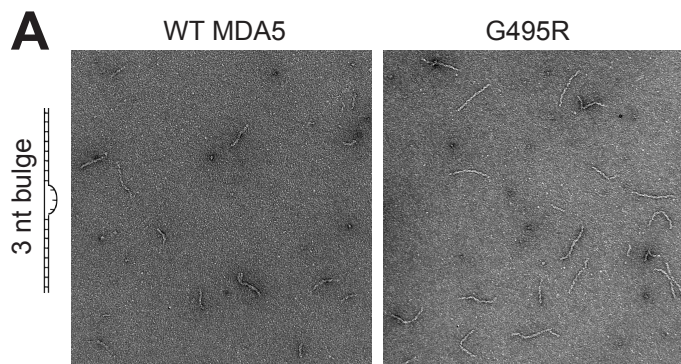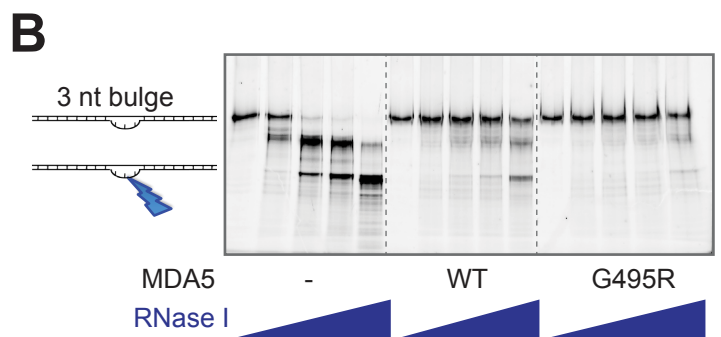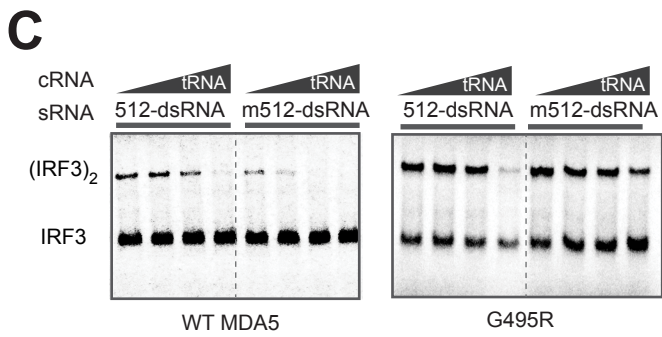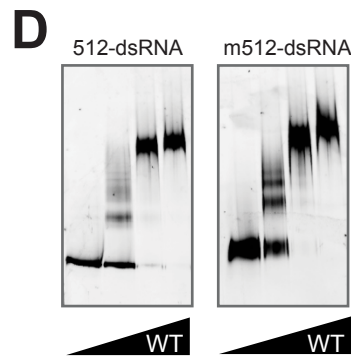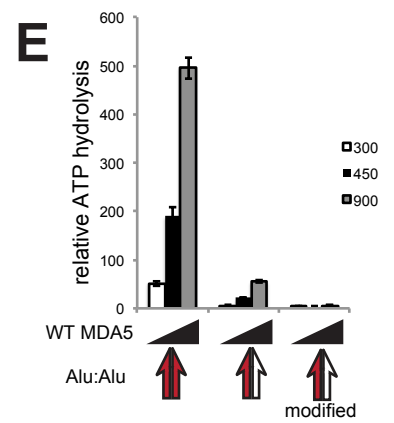

Supplement: NIHMS927930-supplement-6.pdf [file NIHMS927930-supplement-6.pdf]

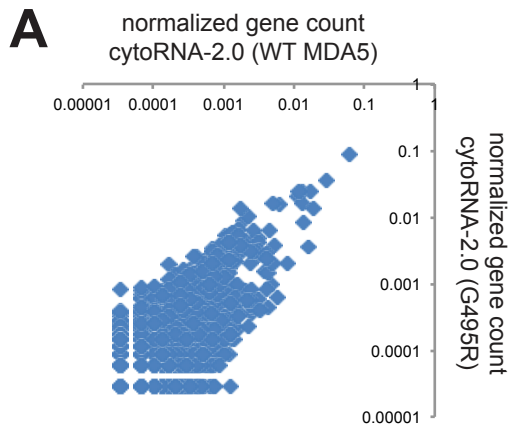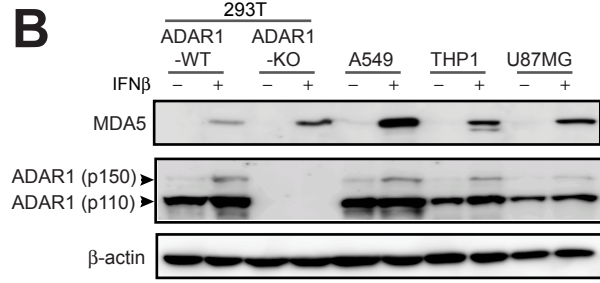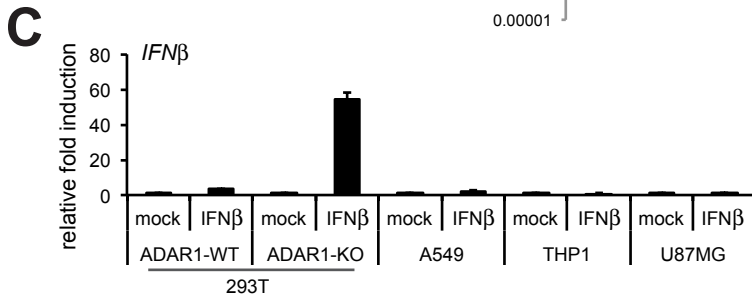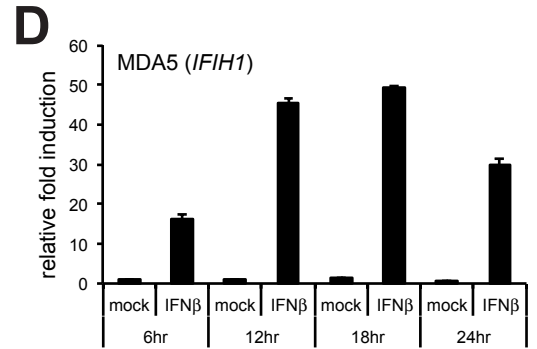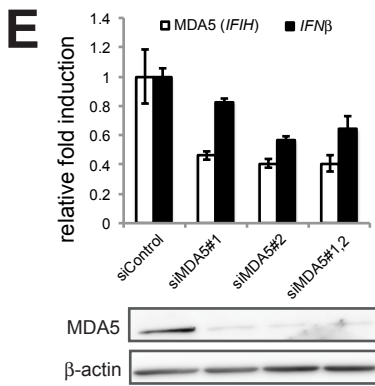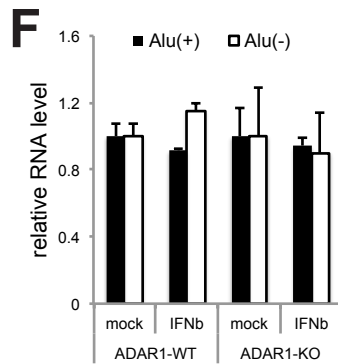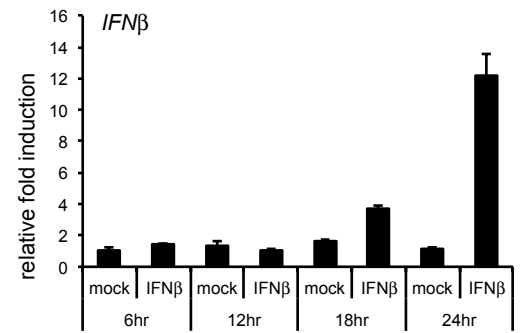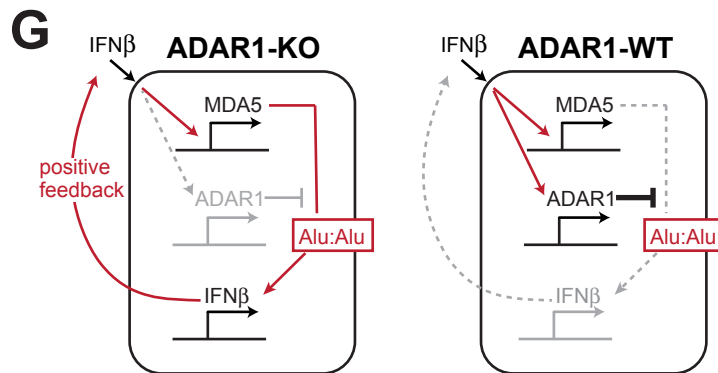

Supplement: NIHMS927930-supplement-7.pdf [file NIHMS927930-supplement-7.pdf]
